# Supplementary material for: High-Throughput All-Optical Analysis of Synaptic Transmission and Synaptic Vesicle Recycling in Caenorhabditis elegans
Source: PLOS journal article supplement (doi:10.1371/journal.pone.0135584), 2015-08-27

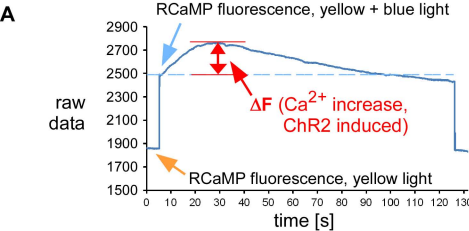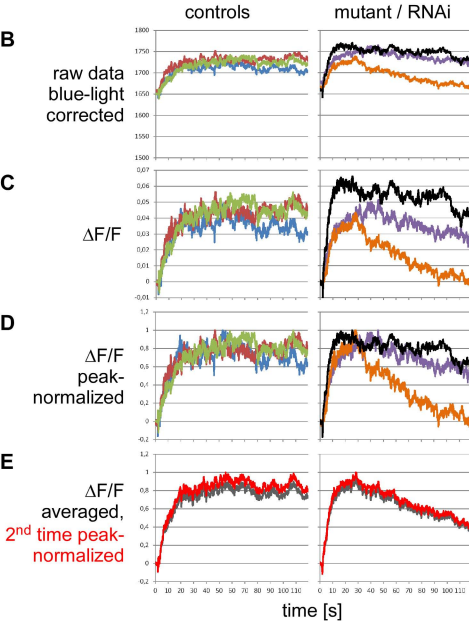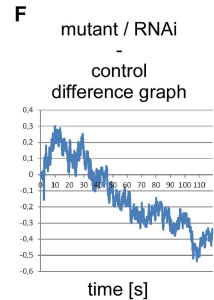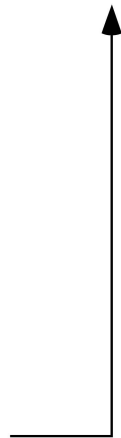

Supplement: S2 (10.1371/journal.pone.0135584.s002) [file journal.pone.0135584.s002.PDF]
