# Supplementary material for: High-Throughput All-Optical Analysis of Synaptic Transmission and Synaptic Vesicle Recycling in Caenorhabditis elegans
Source: PLOS journal article supplement (doi:10.1371/journal.pone.0135584), 2015-08-27
Supplement: S7 (10.1371/journal.pone.0135584.s007) [file journal.pone.0135584.s007.PDF]

**Genes chosen for RCaMP/RNAi screen, based on Sieburth et al., 2005, and controls**

sorted by agglomerative hierarchical clustering into 6 classes (Manhattan distance, complete linkage)

| #  | class 1          |                                   | #  | class 1         |                                  | #  | class 2         |                                 | #  | class 4         |                             |
|----|------------------|-----------------------------------|----|-----------------|----------------------------------|----|-----------------|---------------------------------|----|-----------------|-----------------------------|
| 1  | <i>ins-22</i>    | insulin like neuropeptide         | 34 | <i>unc-10</i>   | RIM (rab-3 interacting molecule) | 67 | <i>rle-1</i>    | RING finger E3 ubiquitin ligase | 87 | <i>rbf-1</i>    | Rabphilin                   |
| 2  | <i>sbt-1</i>     | prohormone convertase             | 35 | <i>glb-10</i>   | globin                           | 68 | <i>unc-29</i>   | nAChR subunit                   | 88 | <i>mat-3</i>    | CDC23/APC8, APC/C regulator |
| 3  | <i>rab-3</i>     | rab3, SV priming                  | 36 | <i>F18F11.4</i> | unknown                          | 69 | <i>rab-5</i>    | RAB GTPase, endosome            | 89 | <i>lin-1</i>    | transcription factor        |
| 4  | <i>fshr-1</i>    | neuropeptide receptor             | 37 | <i>aex-3</i>    | rab-3 GEF                        | 70 | <i>F13A2.4</i>  | unknown                         | 90 | <i>acy-1</i>    | adenylyl cyclase            |
| 5  | <i>sad-1</i>     | Ser/Thr protein kinase            | 38 | <i>Y69E1A.3</i> | Tyrosine-protein kinase          | 71 | <i>rskn-2</i>   | ribosomal protein S6 kinase a-2 | 91 | <i>spp-10</i>   | prosaposin                  |
| 6  | <i>glr-4</i>     | ionotropic glutamater receptor    | 39 | <i>C56G2.15</i> | putative N-acetyltransferase     | 72 | <i>dig-1</i>    | immunoglobulin superfamily      | 92 | <i>W09D10.1</i> | membrane, ARF GAP           |
| 7  | <i>unc-43</i>    | CaMKII                            | 40 | <i>duo-2</i>    | deubiquinating protein           | 73 | <i>egl-10</i>   | RGS for GOA-1                   | 93 | <i>mpk-1</i>    | MAP kinase                  |
| 8  | <i>Y24F12A.1</i> | putative deoxyribonuclease        | 41 | <i>pept-1</i>   | oligopeptide transporter         | 74 | <i>mrp-5</i>    | ABC transporter, CFTR           |    |                 |                             |
| 9  | <i>inx-10</i>    | Innexin, gap junction             | 42 | <i>unc-2</i>    | vGCC alpha subunit               | 75 | <i>rab-10</i>   | RAB GTPase, endocytosis         | #  | class 5         |                             |
| 10 | <i>vps-26</i>    | retromer complex                  | 43 | <i>prx-2</i>    | peroxisomal membrane protein     | 76 | <i>frm-5.1</i>  | FERM domain, scaffold protein   | 94 | <i>prk-2</i>    | kinase                      |
| 11 | <i>rack-1</i>    | receptor of activated C kinase    | 44 | <i>egl-3</i>    | proprotein convertase            | 77 | <i>ric-4</i>    | SNAP-25                         | 95 | <i>npr-12</i>   | kinesin like protein        |
| 12 | <i>let-60</i>    | RAS                               | 45 | <i>F42G10.1</i> | neprilysin metalloproteinase     | 78 | <i>mig-32</i>   | Polycomb repressive complex 1   |    |                 |                             |
| 13 | <i>unc-26</i>    | synaptojanin                      | 46 | <i>apa-2</i>    | adaptin complex alpha chain      |    |                 |                                 | #  | class 6         |                             |
| 14 | <i>par-5</i>     | 14-3-3 protein                    | 47 | <i>F23H11.4</i> | Arf-GAP with Rho-GAP domain      | #  | class 3         |                                 | 96 | <i>srg-2</i>    | GPCR                        |
| 15 | <i>F11E6.3</i>   | brain acid insoluble protein 1    | 48 | <i>C27B7.7</i>  | Titin-like protein               | 79 | <i>C24H11.2</i> | Ser/Thr protein phosphatase     |    |                 |                             |
| 16 | <i>srd-7</i>     | GPCR                              | 49 | <i>par-3</i>    | PDZ domain, polarization         | 80 | <i>nlp-12</i>   | neuropeptide                    |    |                 |                             |
| 17 | <i>aps-2</i>     | adaptin, sigma2 subunit of AP2    | 50 | <i>C14A4.3</i>  | glycosyltransferase              | 81 | <i>gska-3</i>   | Glycogen Synthase Kinase alpha  |    |                 |                             |
| 18 | <i>inx-8</i>     | Innexin, gap junction             | 51 | <i>snb-1</i>    | synaptobrevin                    | 82 | <i>C34B7.2</i>  | Phosphoinositide phosphatase    |    |                 |                             |
| 19 | <i>ndx-9</i>     | NUDIX hydrolase                   | 52 | <i>egl-8</i>    | phospholipase C beta             | 83 | <i>goa-1</i>    | G alpha O                       |    |                 |                             |
| 20 | <i>gei-18</i>    | GEX interacting protein           | 53 | <i>flp-1</i>    | FRMF neuropeptide precursor      | 84 | <i>nab-1</i>    | Neurabin/Spinophilin protein    |    |                 |                             |
| 21 | <i>C42C1.2</i>   | protein phosphatase               | 54 | <i>C25A8.5</i>  | Tyrosine-protein kinase Fer      | 85 | <i>ccb-1</i>    | VGCC beta subunit               |    |                 |                             |
| 22 | <i>hpk-1</i>     | Protein kinase                    | 55 | <i>gsa-1</i>    | G alpha S                        | 86 | <i>egl-30</i>   | G alpha Q                       |    |                 |                             |
| 23 | <i>pdhk-2</i>    | pyruvate dehydrogenase kinase     | 56 | <i>osm-9</i>    | TRPV channel                     |    |                 |                                 |    |                 |                             |
| 24 | <i>unc-36</i>    | VGCC alpha2/delta subunit         | 57 | <i>snn-1</i>    | synapsin                         |    |                 |                                 |    |                 |                             |
| 25 | <i>eat-5</i>     | Innexin, gap junction             | 58 | <i>unc-17</i>   | vAChT                            |    |                 |                                 |    |                 |                             |
| 26 | <i>nep-1</i>     | Neprilysin metalloproteinase      | 59 | <i>unc-104</i>  | kinesin                          |    |                 |                                 |    |                 |                             |
| 27 | <i>C06A1.3</i>   | Ser/Thr protein phosphatase       | 60 | <i>F01E11.3</i> | unknown                          |    |                 |                                 |    |                 |                             |
| 28 | <i>sphk-1</i>    | Sphingosine kinase                | 61 | <i>dyn-1</i>    | dynamamin                        |    |                 |                                 |    |                 |                             |
| 29 | <i>cam-1</i>     | receptor tyrosine kinase          | 62 | <i>itsn-1</i>   | intersectin                      |    |                 |                                 |    |                 |                             |
| 30 | <i>nasp-1</i>    | Nuclear autoantigenic sperm prot. | 63 | <i>snt-1</i>    | synaptotagmin                    |    |                 |                                 |    |                 |                             |
| 31 | <i>ulp-4</i>     | Ubiquitin-like protease           | 64 | <i>unc-41</i>   | stonin                           |    |                 |                                 |    |                 |                             |
| 32 | <i>erp-1</i>     | endophilin B                      | 65 | <i>unc-57</i>   | endophilin A                     |    |                 |                                 |    |                 |                             |
| 33 | <i>eel-1</i>     | Hect E3 ubiquitin ligase          | 66 | <i>unc-78</i>   | actin-interacting protein        |    |                 |                                 |    |                 |                             |

| did not meet significance<br>(2-way ANOVA vs. neg. control) |                                 |
|-------------------------------------------------------------|---------------------------------|
| <i>inx-15</i>                                               | Innexin, gap junction           |
| <i>unc-18</i>                                               | SV priming factor               |
| <i>usp-46</i>                                               | Ubiquitin specific protease     |
| <i>let-70</i>                                               | E2 ubiquitin conjugating enzyme |
| <i>arx-3</i>                                                | Arp2/3 complex component        |
| <i>wdr-23</i>                                               | ubiquitin ligase complex        |
| <i>pkc-1</i>                                                | Protein kinase C                |
| <i>fer-1</i>                                                | Ferlin, membrane fusion         |
| <i>tbc-7</i>                                                | Tre-2/Bub2/Cdc16 domain family  |
| <i>tag-232</i>                                              | PACS1 sorting protein           |

|                                                            |
|------------------------------------------------------------|
| <i>unc-26</i> (reference SV recycling gene)                |
| aldicarb resistant, systemic RNAi, Sieburth et al., 2005   |
| aldicarb resistant, also in mutants; Sieburth et al., 2005 |
| lethal in systemic RNAi, Sieburth et al., 2005             |

|                                                          |
|----------------------------------------------------------|
| other aldicarb resistant genes (www.wormbase.org)        |
| GABA aldicarb RNAi phenotypes; Vashlishan et al., 2008   |
| random controls                                          |
| RNAi positive controls of other known SV recycling genes |
